# Supplementary material
Source: Springer Nature journal article supplement (https://www.springermedizin.de/resource/supplementary/12873_2012_155_MOESM1_ESM.pdf/9431514)

# Traumatic head injury (> 18 years) without risk factors

Risk factors: Anticoagulants/haemophilia, clinical signs of skull fracture, seizure, shunt treatment, multiple injuries (=CT)

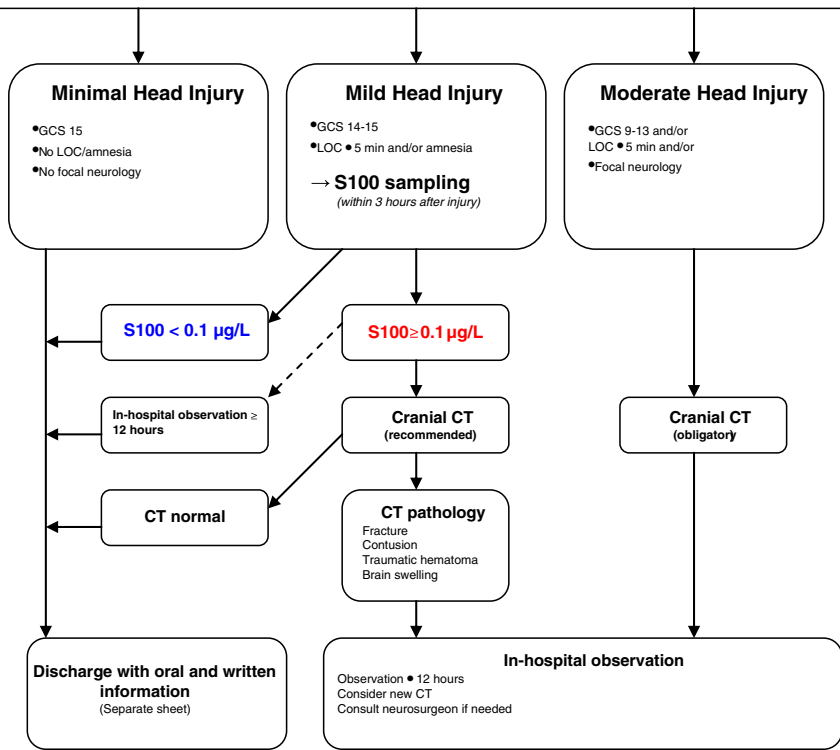

Supplement: MOESM1 [file 9431514]
